# Supplementary material for: Cooperativity of co-factor NR2F2 with Pioneer Factors GATA3, FOXA1 in promoting ERα function
Source: PubMed Central journal article supplement (PMC6771234; doi:10.7150/thno.34874), 2019-08-21
Supplement: thnov09p6501s1.pdf [file thnov09p6501s1.pdf]

**Figure S1**

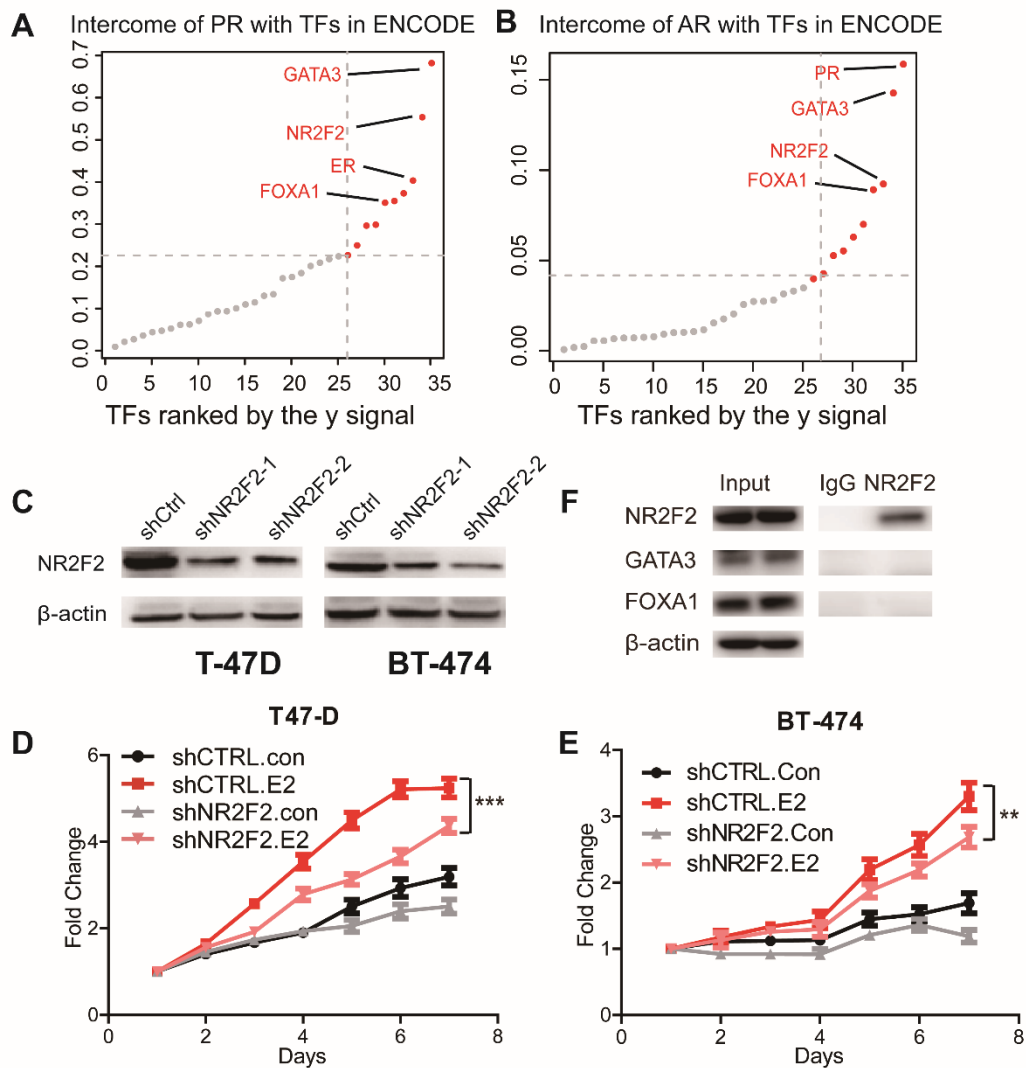

(A, B) Distribution of the overlap (value of y) of all transcription factors with the AR and PR.

(C) NR2F2 stable depletion via lentivirus-delivered shRNA reduces its protein levels in both BT-474 and T47-D cell lines.

(D, E) T-47D and BT-474 breast cancer cells depleted of NR2F2 fail to proliferate in response to oestrogen stimulation compared to cells subjected to the control treatment to a certain degree.

**Figure S2**

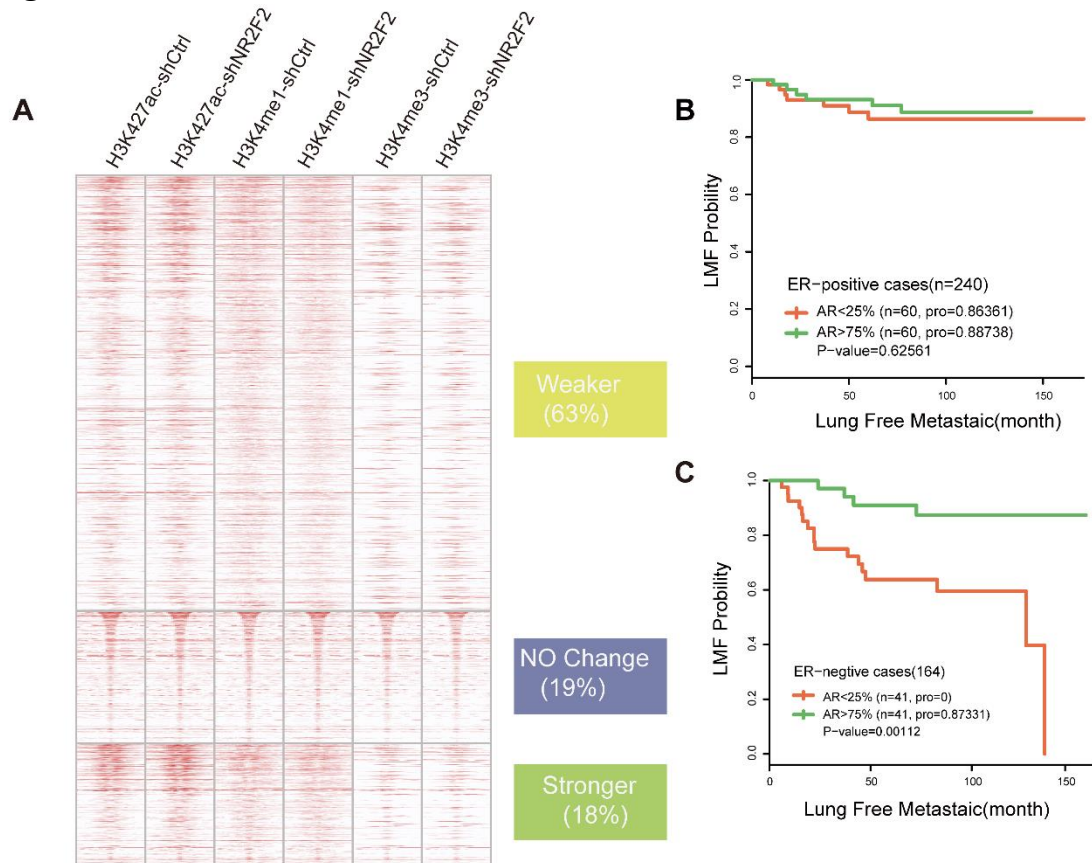

(A) Heatmap analyses of ChIP-seq signals of histone modification (H3K27ac, H3K4me3 and H3K4me1) in the control and shNR2F2 MCF-7 cells, ranked by ChIP-seq signals of ER. All ChIP-seq signals are displayed from -2.5 kb to +2.5 kb surrounding the center of each annotated ER peak.

(B, C) Kaplan-Meier product limit analysis of lung metastasis probability in ERa-positive and ERa-negative breast cancer patients, respectively. Patients were dichotomized by the median percent AR-positive nuclear area (>75% and <25%)

Supplementary Table 1. Data Used in analysis.

| ChIP-Seq      | MCF7             | MDA-MB-231      |          |
|---------------|------------------|-----------------|----------|
| ChIP-Seq      | FOXA1.E2         | HDAC2 RAD21     | H3K4me1  |
|               | FOXA1.Con        | MYC ESRRA       | H3K27ac  |
|               | GATA3.E2         | TCF12 CTCF      |          |
|               | GATA3.Con        | SIN3A MTA1      |          |
|               | ER.E2            | TCF12 SRF       |          |
|               | ER.Con           | MAX MAZ         |          |
|               | H3K4me1.E2       | JUND EGR1       |          |
|               | H3K4me1.Con      | FOXM1 PML       |          |
|               | H3K4me2.E2       | E2F1 REST       |          |
|               | H3K4me2.Con      | FOSL2 GABPA     |          |
|               | H3K27ac.E2       | TEAD4 RFX5      |          |
|               | H3K27ac.Con      | MNT MAFK        |          |
|               | CEBPB            | TCF7L2 GTF2F1   |          |
|               | NR2F2            | ELF1 HSF1       |          |
|               | PR               | ZNF217 TAF1     |          |
|               | CEBPb            |                 |          |
|               | AR               |                 |          |
|               | NR2F2-Con        | H3K4me3-shCtrl  |          |
|               | NR2F2-E2         | H3K4me3-shNR2F2 |          |
|               | ER-shCtrl-E2     | H3K4me1-shCtrl  |          |
| ER-shNR2F2-E2 | H3K4me1-shNR2F2  |                 |          |
| RNA-Seq       | shNR2F2-con      |                 |          |
|               | shCtrl-con       |                 |          |
|               | shNR2F2-E2.12h   |                 |          |
|               | shCtrl-E2.12h    |                 |          |
| ATAC-Seq      | ATAC-Seq-shCtrl  |                 | ATAC-seq |
|               | ATAC-Seq-shNR2F2 |                 |          |
| GRO-Seq       | GRO-Seq.E2       |                 |          |
|               | GRO-Seq.Con      |                 |          |
| DNase-Seq     | DNase-Seq.E2     |                 |          |
|               | DNase-Seq.Con    |                 |          |

Note: data used in black font is downloaded from public dataset and in blue is newly generated by our lab.
